# Supplementary material
Source: ML conference proceedings conference paper supplement (https://proceedings.neurips.cc/paper_files/paper/2018/hash/296472c9542ad4d4788d543508116cbc-Abstract.html)
Supplement: Supplementary file [file 296472c9542ad4d4788d543508116cbc-Supplemental.zip]

## 10 Detailed Proofs and Technical Lemmas

*Proof of Theorem 3.2.* Define  $\phi'$  by  $\phi'(\underline{x}) = \frac{1}{n!} \sum_{\pi \in \sigma(n)} \phi(\pi(\underline{x}))$ , where  $\sigma(n)$  is the symmetric group on  $n$  letters. First note that  $\phi(\pi(\underline{x}))$  satisfies (1) for all  $\pi \in \sigma(n)$ , and that  $\int \phi(\pi(\underline{x})) d\mu_\theta = \int \phi(\underline{x}) d\mu_\theta$ . Then by exchangeability,

$$\begin{aligned} \int \phi'(\underline{x}) d\mu_\theta &= \int \frac{1}{n!} \sum_{\pi \in \sigma(n)} \phi(\pi(\underline{x})) d\mu_\theta = \frac{1}{n!} \sum_{\pi \in \sigma(n)} \int \phi(\pi(\underline{x})) d\mu_\theta \\ &= \frac{1}{n!} \sum_{\pi \in \sigma(n)} \int \phi(\underline{x}) d\mu_\theta = \int \phi(\underline{x}) d\mu_\theta. \end{aligned}$$

To see that  $\phi'$  satisfies  $(\epsilon, \delta)$ -DP, we check condition (1):

$$\begin{aligned} \phi'(\underline{x}) &= \frac{1}{n!} \sum_{\pi \in \sigma(n)} \phi(\pi(\underline{x})) \leq \frac{1}{n!} \sum_{\pi \in \sigma(n)} (e^\epsilon \phi(\pi(\underline{x}')) + \delta) \\ &= \frac{1}{n!} \sum_{\pi \in \sigma(n)} e^\epsilon \phi(\pi(\underline{x}')) + \frac{1}{n!} \sum_{\pi \in \sigma(n)} \delta = e^\epsilon \phi'(\underline{x}') + \delta \\ (1 - \phi'(\underline{x})) &= \left( 1 - \frac{1}{n!} \sum_{\pi \in \sigma(n)} \phi(\pi(\underline{x})) \right) = \frac{1}{n!} \sum_{\pi \in \sigma(n)} (1 - \phi(\pi(\underline{x}))) \\ &\leq \frac{1}{n!} \sum_{\pi \in \sigma(n)} (e^\epsilon (1 - \phi(\pi(\underline{x}')))) + \delta = e^\epsilon (1 - \phi'(\pi(\underline{x}'))) + \delta. \quad \square \end{aligned}$$

**Lemma 10.1.** 1) Let  $L \sim \text{DLap}(b)$ ,  $U \sim \text{Unif}(-1/2, 1/2)$ ,  $G_1, G_2 \stackrel{\text{iid}}{\sim} \text{Geom}(1-b)$ , and  $N_0 \sim \text{Tulap}(m, b, 0)$ , where the pmf of  $L$  is  $f_L(x) = \frac{1-b}{1+b} b^{|x|}$  for  $x \in \mathbb{Z}$ , and the pmf of  $G_1$  is  $f_{G_1}(x) = (1-p)^x p$  for  $x \in \{0, 1, 2, \dots\}$ . Then  $L + U + m \stackrel{d}{=} G_1 - G_2 + U + m \stackrel{d}{=} N_0$ .

2) Let  $N$  be the output of Algorithm 2 with inputs  $m, b, q$ . Then  $N \sim \text{Tulap}(m, b, q)$ .

3) The random variable  $N \sim \text{Tulap}(m, b, q)$  is continuous and symmetric about  $m$ .

*Proof of Lemma 10.1.* 1) We know that  $L \stackrel{d}{=} G_1 - G_2$ , as shown in IK06. Let  $f_U(\cdot)$  denote the pdf of  $U$ , and  $F_U$  denote the cdf of  $U$ . We will use the property that  $f_U(x) = f_U(-x)$  and  $F_U(-x) = 1 - F_U(x)$ . Then the pdf of  $L + U$  is

$$f_{L+U}(x) = f_U(x - [x]) \left( \frac{1-b}{1+b} \right) b^{|[x]|} = \begin{cases} f_U(x - [x]) \left( \frac{1-b}{1+b} \right) b^{-[x]} & [x] \leq 0 \\ f_U(x - [x]) \left( \frac{1-b}{1+b} \right) b^{[x]} & [x] > 0. \end{cases}$$

If  $[x] \leq 0$ , then we have

$$\begin{aligned} F_{L+U}(x) &= \int_{-\infty}^x f_U(t - [t]) \left( \frac{1-b}{1+b} \right) b^{-[t]} dt \\ &= \int_{-\infty}^{[x]-1/2} f_U(t - [t]) \left( \frac{1-b}{1+b} \right) b^{-[t]} dt + \int_{[x]-1/2}^x f_U(t - [x]) \left( \frac{1-b}{1+b} \right) b^{-[x]} dt \\ &= \sum_{t=-\infty}^{[x]-1} \left( \frac{1-b}{1+b} \right) b^{-t} + \int_{[x]-1/2}^x f_U(t - [x]) \left( \frac{1-b}{1+b} \right) b^{-[x]} dt \\ &= \frac{b^{-[x]+1}}{1+b} + F_U(x - [x]) \left( \frac{1-b}{1+b} \right) b^{-[x]} \\ &= \frac{b^{-[x]}}{1+b} (b + F_U(x - [x])(1-b)). \end{aligned}$$

Since,  $L + U$  is symmetric about zero, as both  $L$  and  $U$  are symmetric about zero, for  $[x] \geq 0$  we have  $F_{L+U}(x) = 1 - F_{L+U}(-x)$ . The rest follows by replacing  $x$  with  $x - m$ , and  $F_U(x) = x + 1/2$ .

- 2) If  $q = 0$ , then by part 1), it is clear that the output of Algorithm 2 has the correct distribution. If  $q > 0$ , then by rejection sampling, we have that  $N \sim \text{Tulap}(m, b, q)$ . For an introduction to rejection sampling, see Bis06, Chapter 11.
- 3) This property follows immediately from 1), and that  $\text{Tulap}(m, b, q)$  is truncated equally on both sides of  $m$ .  $\square$

**Lemma 10.2.** *Let  $N \sim \text{Tulap}(m, b, q)$  and let  $t \in \mathbb{Z}$ . Then  $F_N(t) = \begin{cases} b^{-t}C(m) & t \leq [m] \\ 1 - b^tC(-m) & t > [m] \end{cases}$ , where  $C(m) = (1+b)^{-1}b^{[m]}(b + ([m] - m + 1/2)(1-b))$ .  $C(m)$  is positive, monotone decreasing, and continuous in  $m$ . Furthermore,  $b^{-[m]}C(m) = 1 - b^{[m]}C(-m)$ .*

*Proof of Lemma 10.2.* The form of the cdf at integer values is easily verified from Lemma 10.1. It is clear that  $C(m)$  is positive. It is also clear that  $C(m)$  is continuous and monotone decreasing for all  $m \in \mathbb{R} \setminus \{z + 1/2 \mid z \in \mathbb{Z}\}$ . So, we will check that  $C$  is continuous at  $m = z + 1/2$  for  $z \in \mathbb{Z}$ :

$$\lim_{\epsilon \downarrow 0} (1+b)C(z + 1/2 + \epsilon) = \lim_{\epsilon \downarrow 0} b^{z+1}(b + (1-\epsilon)(1-b)) = b^{z+1}$$

$$\lim_{\epsilon \downarrow 0} (1+b)C(z + 1/2 - \epsilon) = \lim_{\epsilon \downarrow 0} b^z(b + \epsilon(1-b)) = b^{z+1}.$$

Since  $C$  is continuous on  $\mathbb{R}$  and monotone decreasing almost everywhere, it follows that  $C$  is monotone decreasing on  $\mathbb{R}$  as well.

Call  $\alpha(m) = [m] - m + 1/2$ , which lies in  $[0, 1]$ . Note that  $\alpha(-m) = -[m] + m + 1/2 = 1 - \alpha(m)$ . Then

$$\begin{aligned} (1+b)b^{-[m]}C(m) &= b + \alpha(m)(1-b) = b + (1 - \alpha(-m))(1-b) = b + (1-b) - \alpha(-m)(1-b) \\ &= (1+b) - (b + \alpha(-m)(1-b)) = (1+b)(1 - b^{[m]}C(-m)). \end{aligned} \quad \square$$

*Proof of Lemma 4.3.* First we show that 1) and 2) are equivalent. Clearly the  $m$  is the same for both. We must show that for  $p \in (0, 1)$ ,  $e^\epsilon p \leq 1 - e^{-\epsilon}(1-p)$  whenever  $p \leq \frac{1}{1+e^\epsilon}$ , and  $e^\epsilon p > 1 - e^{-\epsilon}(1-p)$  when  $p > \frac{1}{1+e^\epsilon}$ . Setting equal  $e^\epsilon p = 1 - e^{-\epsilon}(1-p)$  we find that  $p = \frac{1}{1+e^\epsilon}$ . As  $p \rightarrow 1$ , we have that  $e^\epsilon p > 1 - e^{-\epsilon}(1-p)$  and as  $p \rightarrow 0$ , we have  $e^\epsilon p < 1 - e^{-\epsilon}(1-p)$ . We conclude that 1) and 2) are equivalent.

Next we show that 2) and 3) are equivalent. First we show that  $F_{N_0}(x - m)$  satisfies the recurrence relation in 2). Set  $b = e^{-\epsilon}$ . First we show that for  $t \in \mathbb{Z}$  such that  $t \leq [m] - 1$ ,  $F_{N_0}(t - m) \leq \frac{1}{1+e^\epsilon}$  and for  $t \geq [m]$ ,  $F_{N_0}(t - m) \geq \frac{1}{1+e^\epsilon}$ . Since,  $F_{N_0}(\cdot - m)$  is increasing, it suffices to check  $t = [m] - 1$  and  $t = [m]$ :

$$\begin{aligned} F_{N_0}([m] - 1 - m) &= b^{-[m]+1+[m]} \frac{(b + ([m] - m + 1/2)(1-b))}{1+b} \leq \frac{b}{1+b} = \frac{1}{1+e^\epsilon} \\ F_{N_0}([m] - m) &= b^{-[m]+[m]} \frac{(b + ([m] - m + 1/2)(1-b))}{1+b} \geq \frac{b}{1+b} = \frac{1}{1+e^\epsilon}, \end{aligned}$$

where we use the fact that  $0 \leq [m] - m + 1/2 \leq 1$ . Now, let  $t \in \mathbb{Z}$  and check three cases:

- Let  $t < [m]$ , then  $e^\epsilon F_{N_0}(t - m) = e^\epsilon b^{-t}C(m) = b^{-(t+1)}C(m) = F_{N_0}(t + 1 - m)$ .
- Let  $t = [m]$ . Using Lemma 10.2,  $1 - e^{-\epsilon}(1 - F_{N_0}(t - m)) = 1 - b(1 - b^{-[m]}C(m)) = 1 - b + b(1 - b^{[m]}C(-m)) = 1 - b + b - b^{[m+1]}C(-m) = F_{N_0}(t + 1 - m)$ .
- Let  $t > m$ . Then  $1 - e^{-\epsilon}(1 - F_{N_0}(t - m)) = 1 - b(b^tC(-m)) = 1 - b^{t+1}C(-m) = F_{N_0}(t + 1 - m)$ .

Finally, for any value  $c \in (0, 1)$ , we can find  $m$  such that  $F_{N_0}(0 - m) = c$ , by the intermediate value theorem. On the other hand, given  $m$ , set  $\phi(0) = F_{N_0}(0 - m)$ .  $\square$

*Proof of Lemma 4.4.* Note that  $(\phi_1 - \phi_2)(g - kf) \geq 0$  for almost all  $x \in \mathcal{X}$  (with respect to  $\mu$ ). Then  $\int (\phi_1 - \phi_2)(g - kf) d\mu \geq 0$ . Hence,  $\int \phi_1 g d\mu - \int \phi_2 g d\mu \geq k(\int \phi_1 f d\mu - \int \phi_2 f d\mu) \geq 0$ .  $\square$

*Proof of Theorem 4.5.* First note that  $\phi^* \in \mathcal{D}_{\epsilon,0}^n$ , since by Lemma 4.3,  $\phi^*(x) = \min\{e^\epsilon \phi^*(x-1), 1 - e^{-\epsilon}(1 - \phi^*(x-1))\}$ . So,  $\phi^*$  satisfies (2)-(5). Next, since by Lemma 10.2,  $F_{N_0}(x-m)$  is a continuous, decreasing function in  $m$  with  $\lim_{m \uparrow \infty} F_{N_0}(x-m) = 0$  and  $\lim_{m \downarrow -\infty} F_{N_0}(x-m) = 1$ , we can find  $m$  such that  $E_{\theta_0} \phi^*(x) = \alpha$  by the Intermediate Value Theorem.

Now that we have argued that  $\phi^*$  is a valid test, the rest of the result is an application of Lemma 4.4. It remains to show that the assumptions are satisfied for the lemma to apply. Let  $\phi \in \mathcal{D}_{\epsilon,0}^n$  such that  $E_{\theta_0} \phi(x) \leq \alpha$ .

We claim that either  $\phi(x) = \phi^*(x)$  for all  $x \in \{0, 1, 2, \dots, n\}$  or there exists  $y$  such that  $\phi(y) < \phi^*(y)$ . To the contrary, suppose that  $\phi^*(x) \leq \phi(x)$  for all  $x$  and there exists  $z$  such that  $\phi^*(z) < \phi(z)$ . But this implies that  $\phi^*(0) < \phi(0)$  (as we implied by the following paragraphs, by setting  $y = 0$ ). Then  $E_{\theta_0} \phi^*(x) < E_{\theta_0} \phi(x) \leq \alpha$  since the pmf of  $\text{Binom}(n, \theta)$  is nonzero at  $x = 0$ , contradicting the fact that  $E_{\theta_0} \phi^*(x) = \alpha$ . We conclude that there exists  $y$  such that  $\phi^*(y) > \phi(y)$ .

Let  $y$  be the smallest point in  $\{0, 1, 2, \dots, n\}$  such that  $\phi^*(y) \geq \phi(y)$ . We claim that for all  $x \geq y$ , we have  $\phi^*(x) \geq \phi(x)$ . We already know that for  $y = x$ , the claim holds. For induction, suppose the claim holds for some  $x \geq y$ . By Lemma 4.3, we know that  $\phi^*(x+1) = \min\{e^\epsilon \phi^*(x), 1 - e^{-\epsilon}(1 - \phi^*(x))\}$ , and by constraints (2)-(5), we know that  $\phi(x+1) \leq \min\{e^\epsilon \phi(x), 1 - e^{-\epsilon}(1 - \phi(x))\}$ .

- Case 1: If  $\phi^*(x) \leq \frac{1}{1+e^\epsilon}$ , then by Lemma 4.3,  $\phi^*(x+1) = e^\epsilon \phi^*(x) \geq e^\epsilon \phi(x) \geq \phi(x+1)$ .
- Case 2: If  $\phi^*(x) > \frac{1}{1+e^\epsilon}$ , then by Lemma 4.3,  $\phi^*(x+1) = 1 - e^{-\epsilon}(1 - \phi^*(x)) \geq 1 - e^{-\epsilon}(1 - \phi(x)) \geq \phi(x+1)$ .

We conclude that  $\phi^*(x+1) \geq \phi(x+1)$ . By induction, the claim holds for all  $x \in \{y, y+1, y+2, \dots, n\}$ . So, we have that  $\phi^*(x) \geq \phi(x)$  for  $x \in \{y, y+1, y+2, \dots, n\}$  and  $\phi^*(x) \leq \phi(x)$  for  $x \in \{0, 1, 2, \dots, y-1\}$ . Since  $\text{Binom}(n, \theta)$  has a monotone likelihood ratio in  $\theta$ , by Lemma 4.4 we have that  $E_{\theta_1} \phi^*(x) \geq E_{\theta_1} \phi(x)$ . We conclude that  $\phi^*$  is UMP- $\alpha$  among  $\mathcal{D}_{\epsilon,0}^n$  for the stated hypothesis test.  $\square$

*Proof of Lemma 5.1.* We will abbreviate  $F(x) := F_{N_0}(x-m)$ , where  $N_0 \sim \text{Tulap}(0, b = e^{-\epsilon}, 0)$  to simplify notation. First we will show that 1) and 2) are equivalent. It is clear that  $y$  and  $m$  are the same in both. Next consider  $1 - e^{-\epsilon}(1-p) + e^{-\epsilon}\delta = e^\epsilon p + \delta$ , solving for  $p$  gives  $p = \frac{1-\delta}{1+e^\epsilon}$ . Considering as  $p \rightarrow 0$  and  $p \rightarrow 1$ , we see that  $1 - e^{-\epsilon}(1-p) + e^{-\epsilon}\delta \geq e^\epsilon p + \delta$  when  $p \leq \frac{1-\delta}{1+e^\epsilon}$  and  $1 - e^{-\epsilon}(1-p) + e^{-\epsilon}\delta \leq e^\epsilon p + \delta$  when  $p \geq \frac{1-\delta}{1+e^\epsilon}$ .

Next solving  $1 - e^{-\epsilon}(1-p) + e^{-\epsilon}\delta = 1$  for  $p$  gives  $p = 1 - \delta$ . So,  $1 - e^{-\epsilon}(1-p) + e^{-\epsilon}\delta \leq 1$  when  $p \leq 1 - \delta$  and  $1 - e^{-\epsilon}(1-p) + e^{-\epsilon}\delta \geq 1$  when  $p \geq 1 - \delta$ . Lastly, solving  $e^\epsilon p + \delta = 1$  for  $p$  gives  $p = \frac{1-\delta}{e^\epsilon} \geq \frac{1-\delta}{1+e^\epsilon}$ . Combining all of these comparisons, we see that 1) is equivalent to 2).

Before we justify the equivalence of 2) and 3), we argue the following claim. Let  $\phi(x)$  be defined as in 3). Then  $\phi(x) \leq \frac{1-\delta}{1+e^\epsilon}$  if and only if  $F(x) \leq \frac{1}{1+e^\epsilon}$ . Suppose that  $\phi(x) \leq \frac{1-\delta}{1+e^\epsilon}$ . Then  $\frac{F(x)-q/2}{1-q} \leq \frac{1-\delta}{1+e^\epsilon}$ . Thus,

$$\begin{aligned} F(x) &\leq \frac{(1-q)(1-\delta)}{1+e^\epsilon} + \frac{q}{2} \\ &= \frac{1}{1+e^\epsilon} \left( (1-q)(1-\delta) + \left( \frac{b+1}{b} \right) \frac{q}{2} \right) \\ &= \frac{1}{1+e^\epsilon} \left( \frac{(1-b)(1-\delta)}{1-b+2\delta b} + \left( \frac{b+1}{b} \right) \frac{\delta b}{1-b+2\delta b} \right) \\ &= \frac{1}{1+e^\epsilon} (1-b+2\delta b)^{-1} ((1-b)(1-\delta) + (b+1)\delta) \\ &= \frac{1}{1+e^\epsilon}. \end{aligned}$$

We are now ready to show that  $\phi(x)$  as described in 3) fits the form of 2).

- Suppose that  $0 < \phi(x) < \frac{1-\delta}{1+e^\epsilon}$ . By the above, we know that  $F(x) \leq \frac{1}{1+e^\epsilon}$ . By Lemma 4.3,

$$\begin{aligned} e^\epsilon \phi(x) + \delta &= \frac{e^\epsilon F(x) - \frac{q}{2b}}{1-q} + \delta = \frac{F(x+1) - \frac{q}{2}}{1-q} + \frac{\frac{q}{2} - \frac{q}{2b}}{1-q} + \delta \\ &= \phi(x+1) + \frac{\delta b}{1-b} \left(1 - \frac{1}{b}\right) + \delta = \phi(x+1). \end{aligned}$$

- Suppose that  $\frac{1-\delta}{1+e^\epsilon} < \phi(x) \leq 1 - \delta$ . Then we have  $F(x) > \frac{1}{1+e^\epsilon}$ . Then

$$\begin{aligned} 1 - e^{-\epsilon}(1 - \phi(x)) + e^{-\epsilon}\delta &= 1 - e^{-\epsilon} \left(1 - \frac{F(x) - q/2}{1-q}\right) + e^{-\epsilon}\delta \\ &= (1-q)^{-1} (1-q - e^{-\epsilon}(1 - F(x) - q/2)) + e^{-\epsilon}\delta \\ &= (1-q)^{-1} (1 - e^{-\epsilon}(1 - F(x)) + bq/2 - q) + b\delta \\ &= (1-q)^{-1} (F(x+1) - q/2) + \frac{(b-1)q/2}{1-q} + b\delta \\ &= \phi(x+1) + \frac{\delta b(b-1)}{1-b} + b\delta \\ &= \phi(x+1). \end{aligned}$$

- Finally, we must show that if  $\phi(x) = 1$  then  $\phi(x-1) \geq 1 - \delta$ . It suffices to show that  $F(x) \geq 1 - q/2$  implies that  $F(x-1) \geq (1-\delta)(1-q) + q/2 = 1 - (1/b)(q/2)$ . We prove the contrapositive. Suppose that  $F(x-1) < 1 - (1/b)(q/2)$ . Then since  $F$  satisfies property (4), we know that

$$\begin{aligned} F(x) &\leq 1 - e^{-\epsilon}(1 - F(x-1)) < 1 - b(1 - (1 - (1/b)(q/2))) \\ &= 1 - b(1 - 1 + (1/b)(q/2)) = 1 - q/2. \end{aligned}$$

We have justified that  $\phi(x)$  in 3) satisfies the recurrence relation in 2). Given  $\phi'$  of the form in 2), with first non-zero entry at  $y$ , by Lemma 10.2 and Intermediate Value Theorem, we can find  $m \in \mathbb{R}$  such that  $\phi(y) = \phi'(y)$ . We conclude that 1), 2), and 3) are all equivalent.  $\square$

*Proof of Corollary 5.3.* First we show that  $\phi^*$  is UMP- $\alpha$  for  $H_0 : \theta \leq \theta_0$  versus  $H_1 : \theta > \theta_0$ . Since  $\phi^*(x)$  is increasing and  $\text{Binom}(n, \theta)$  has a monotone likelihood ratio in  $\theta$ ,  $E_{\theta_0} \phi^* \leq E_{\theta_0} \phi^* = \alpha$  for all  $\theta \leq \theta_0$  (property of MLR). By Theorem 4.5, we know that  $\phi^*(x)$  is most powerful for any alternative  $\theta_1 > \theta_0$  versus the null  $\theta_0$ . So,  $\phi^*$  is UMP- $\alpha$ .

Next we show that  $\psi^*$  is UMP- $\alpha$  for  $H_1 : \theta \geq \theta_0$  versus  $H_1 : \theta < \theta_0$ . First note that  $\sup_{\theta \geq \theta_0} \mathbb{E}_{\theta} \psi^* = \alpha$ . Let  $\psi$  be another test with  $\sup_{\theta \geq \theta_0} \mathbb{E}_{\theta} \psi \leq \alpha$ . Let  $\theta_1 < \theta_0$ , we will show that  $\mathbb{E}_{\theta_1} \psi^* \geq \mathbb{E}_{\theta_1} \psi$ . Define  $\tilde{\psi}^*(x) = \psi^*(n-x) = 1 - F_{N_0}(n-x-m_2) = F_{N_0}(x+m_2-n)$  and  $\tilde{\psi}(x) = \psi(n-x)$ . Then using the map  $(x, \theta) \mapsto (n-x, 1-\theta)$ , we have that  $\mathbb{E}_{X \sim (1-\theta_0)} \tilde{\psi}^*(X) = \mathbb{E}_{X \sim (1-\theta_0)} \psi^*(n-X) = \mathbb{E}_{Y \sim \theta_0} \psi^*(Y) = \alpha$ . By a similar argument for  $\psi$ , we have that both  $\tilde{\psi}^*$  and  $\tilde{\psi}$  are level  $\alpha$  for  $H_0 : \theta \leq 1 - \theta_0$  versus  $H_1 : \theta > 1 - \theta_0$ . Since  $\mathbb{E}_{(1-\theta_0)} \tilde{\psi}^* = \alpha$ , and  $\tilde{\psi}^*(x) = F_{N_0}(x - m')$ , we have that  $\tilde{\psi}^*$  is UMP- $\alpha$  for  $H_0 : \theta \leq (1 - \theta_0)$  versus  $H_1 : \theta > (1 - \theta_0)$ . Then for  $\theta_1 < \theta_0$ ,

$$\mathbb{E}_{X \sim \theta_1} \psi^*(X) = \mathbb{E}_{Y \sim (1-\theta_1)} \tilde{\psi}^*(Y) \geq \mathbb{E}_{Y \sim (1-\theta_1)} \tilde{\psi}(Y) = \mathbb{E}_{X \sim \theta_1} \psi(X).$$

We conclude that  $\psi^*$  is UMP- $\alpha$  for  $H_1 : \theta \geq \theta_0$  versus  $H_1 : \theta < \theta_0$ .  $\square$

**Lemma 10.3.** Observe  $\underline{x} \in \mathcal{X}^n$ . Let  $T : \mathcal{X}^n \rightarrow \mathbb{R}$ , and let  $\{\mu_{\underline{x}} \mid \underline{x} \in \mathcal{X}^n\}$  be a set of probability measures on  $\mathbb{R}$ , dominated by Lebesgue measure. Suppose that  $\mu_{\underline{x}}$  is parameterized by  $T(\underline{x})$  and  $\mu_{\underline{x}}$  has MLR in  $T(\underline{x})$ . Then  $\{\mu_{\underline{x}}\}$  satisfies  $(\epsilon, \delta)$ -DP if and only if for all  $H(\underline{x}_1, \underline{x}_2) = 1$  and all  $t \in \mathbb{R}$ ,

$$\mu_{\underline{x}_1}((-\infty, t)) \leq e^\epsilon \mu_{\underline{x}_2}((-\infty, t)) + \delta, \quad (6)$$

$$\mu_{\underline{x}_1}((t, \infty)) \leq e^\epsilon \mu_{\underline{x}_2}((t, \infty)) + \delta. \quad (7)$$

*Proof of Lemma 10.3.* Let  $\alpha \in [0, 1]$  be given. We will only consider  $B \subset \mathbb{R}$  (Lebesgue measurable) such that  $\mu_{\underline{x}_2}(B) = \alpha$ . Then demonstrating  $(\epsilon, \delta)$ -DP requires  $\sup_{\{B | \mu_{\underline{x}_2}(B) = \alpha\}} \mu_{\underline{x}_1}(B) \leq e^\epsilon \alpha + \delta$ .

We interpret this problem as testing the hypothesis  $H_0 : \underline{x} = \underline{x}_2$  versus  $H_1 : \underline{x} = \underline{x}_1$ , using the rejection region  $B$ , where  $\alpha$  is the type I error, and  $\mu_{\underline{x}_1}(B)$  is the power. We know that  $\sup_{\{B | \mu_{\underline{x}_2}(B) = \alpha\}} \mu_{\underline{x}_1}(B)$  is achieved by the Neyman-Pearson Lemma. Since  $\mu_{\underline{x}}$  has an MLR in  $T(\underline{x})$ ,  $\arg \sup_{\{B | \mu_{\underline{x}_2}(B) = \alpha\}} \mu_{\underline{x}_1}(B)$  is either of the form  $(-\infty, t)$  or  $(t, \infty)$ , depending on whether  $T(\underline{x}_1)$  is greater or lesser than  $T(\underline{x}_2)$ . Since  $\mu_{\underline{x}_1}$  is dominated by Lebesgue measure for all  $\underline{x}_1$ ,  $\mu_{\underline{x}_2}((-\infty, t))$  is continuous in  $t$ , which allows us to achieve exactly  $\alpha$  type I error.  $\square$

*Proof of Theorem 6.1.* Let  $Z \sim \text{Tulap}\left(T(x), b = e^{-\epsilon}, \frac{2\delta b}{1-b+2\delta b}\right)$ . We know that the distribution of  $Z$  is symmetric with location  $T(x)$ , and the pdf  $f_Z(t)$  is increasing as a function of  $|t - T(x)|$ . It follows that  $f_Z(t)$  has a MLR in  $T(x)$ . By Lemma 5.1, we know that  $\phi(x) = F_Z(m)$  satisfies (2)-(5), so by Lemma 10.3, we have the desired result.  $\square$

**Definition 10.4** (p-Value: CB02). For a random vector  $X_i \stackrel{\text{iid}}{\sim} f_\theta$ , a *p-value* for  $H_0 : \theta \in \Theta_0$  versus  $H_1 : \theta \in \Theta_1$  is a statistic  $p(\underline{X})$  taking values in  $[0, 1]$ , such that for every  $\alpha \in [0, 1]$ ,

$$\sup_{\theta \in \Theta_0} P_\theta(p(X) \leq \alpha) \leq \alpha.$$

The smaller the value of  $p(X)$ , the greater evidence we have for  $H_1$  over  $H_0$ .

*Proof of Theorem 6.2.* We denote by  $F_{Z \sim \theta_0}(\cdot)$  the cdf of the random variable  $Z$ , distributed as  $Z | X \sim \text{Tulap}(X, b, q)$  and  $X \sim \text{Binom}(n, \theta_0)$ .

1. First we show that  $p(\theta_0, Z)$  is a *p-value*, according to Definition 10.4. To this end, consider

$$\sup_{\theta \leq \theta_0} P_{Z|X \sim \text{Tulap}(X, b, q)}(p(\theta, Z) \leq \alpha) = P_{Z|X \sim \text{Tulap}(X, b, q)}(p(\theta_0, Z) \leq \alpha)$$

using the fact that  $X$  has a monotone likelihood ratio in  $\theta$ . Note that  $p(\theta_0, Z) = 1 - F_{Z \sim \theta_0}(Z)$ . When  $X \sim \text{Binom}(n, \theta_0)$ , we have that  $p(\theta_0, Z) = 1 - F_{Z \sim \theta_0}(Z) \sim \text{Unif}(0, 1)$ . So,

$$P_{Z|X \sim \text{Tulap}(X, b, q)}(p(\theta_0, Z) \leq \alpha) = P_{U \sim \text{Unif}(0, 1)}(U \leq \alpha) = \alpha.$$

2. Let  $N \sim \text{Tulap}(0, b, q)$ , and recall from Theorem 5.2 that the UMP- $\alpha$  test for  $H_0 : \theta \leq \theta_0$  versus  $H_1 : \theta > \theta_0$  is  $\phi^*(x) = F_N(x - m)$ , where  $m$  satisfies  $E_{\theta_0} \phi^*(x) = \alpha$ . We can write  $\phi^*$  as

$$\begin{aligned} \phi^*(x) &= F_N(x - m) = P_{N \sim \text{Tulap}(0, b, q)}(N \leq x - m | X) \\ &= P_N(X + N \geq m | X) = P_{Z|X \sim \text{Tulap}(X, b, q)}(Z \geq m | X) \end{aligned}$$

where  $m$  is chosen such that

$$\begin{aligned} \alpha &= E_{X \sim \theta_0} \phi^*(X) = E_{X \sim \theta_0} P_{Z|X \sim \text{Tulap}(X, b, q)}(Z \geq m | X) \\ &= P_{Z|X \sim \text{Tulap}(X, b, q)}(Z \geq m) = 1 - F_{Z \sim \theta_0}(m), \end{aligned}$$

where  $F$  is the cdf of the marginal distribution of  $Z$ , where  $Z|X \sim \text{Tulap}(X, b, q)$  and  $X \sim \text{Binom}(n, \theta_0)$ . From this equation, we have that  $m$  is the  $(1 - \alpha)$ -quantile of the marginal distribution of  $Z$ .

Let  $R|X \sim \text{Bern}(\phi^*(X))$  and  $Z|X \sim \text{Tulap}(X, b, q)$ . Then

$$\begin{aligned} R|X &\stackrel{d}{=} I(Z \geq m) \mid X \stackrel{d}{=} I(F_{Z \sim \theta_0}(Z) \geq F_{Z \sim \theta_0}(m)) \mid X \\ &\stackrel{d}{=} I(1 - \alpha \leq F_{Z \sim \theta_0}(Z)) \mid X \\ &\stackrel{d}{=} I(p(\theta_0, Z) \leq \alpha) \mid X. \end{aligned}$$

Taking the conditional expected value  $\mathbb{E}(\cdot \mid X)$  of both sides gives

$$\phi^*(x) = E(R \mid X) = P_{Z|X \sim \text{Tulap}(X, b, q)}(p(\theta_0, Z) \leq \alpha \mid X).$$

3. We can express  $p(\theta_0, Z)$  in the following way:

$$\begin{aligned} p(\theta_0, Z) &= P_{\substack{X \sim \text{Binom}(n, \theta_0) \\ N \sim \text{Tulap}(0, b, q)}}(X + N \geq Z) = P_{X, N}(-N \leq X - Z) \\ &= E_{X \sim \text{Binom}(n, \theta_0)} P_N(N \leq X - Z \mid X) = E_{X \sim \text{Binom}(n, \theta_0)} F_N(X - Z) \\ &= \sum_{x=0}^n F_N(x - Z) \binom{n}{x} \theta_0^x (1 - \theta_0)^{n-x}, \end{aligned}$$

which is just the inner product of the vectors  $\underline{F}$  and  $\underline{B}$  in algorithm 1. □
